# Supplementary material for: Mechanical and physicochemical behavior of a 3D hydrogel scaffold during cell growth and proliferation
Source: Royal Society of Chemistry journal article supplement (doi:10.1039/c9ra08162c), 2020-01-01
Supplement: c9ra08162c1.pdf [file c9ra08162c1.pdf]

Supplementary information

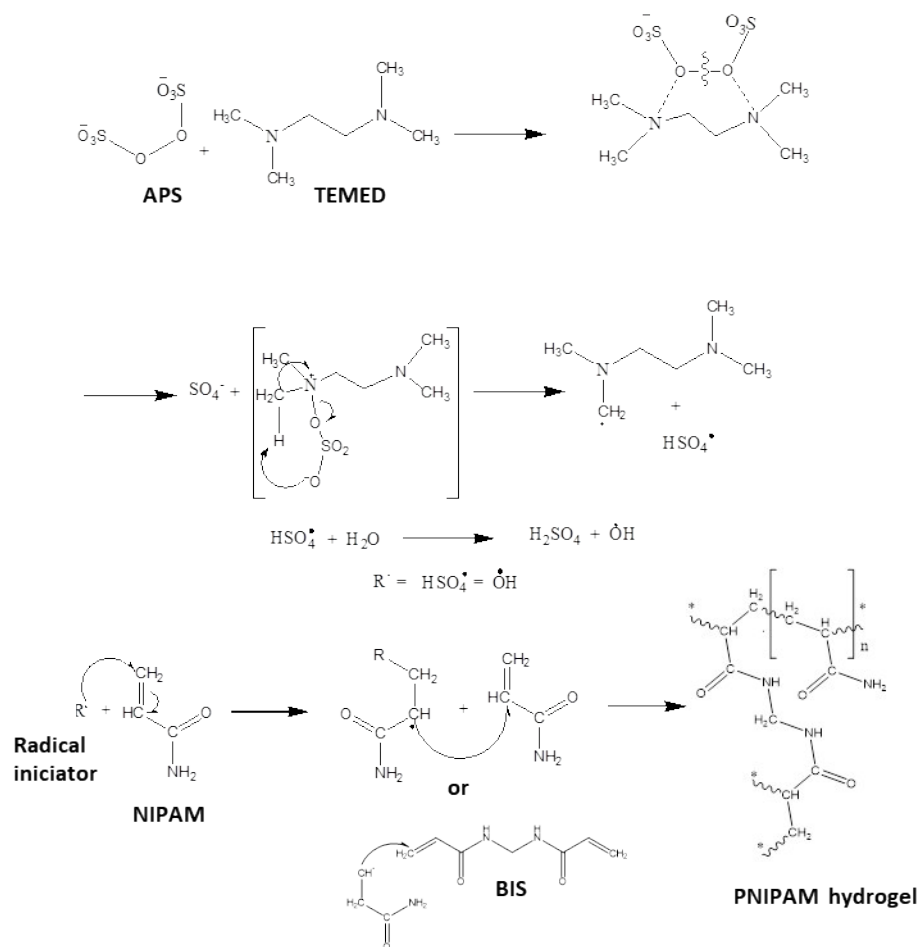

Scheme S1. Mechanism of the formation of PNIPAM hydrogel via free radical polymerization.

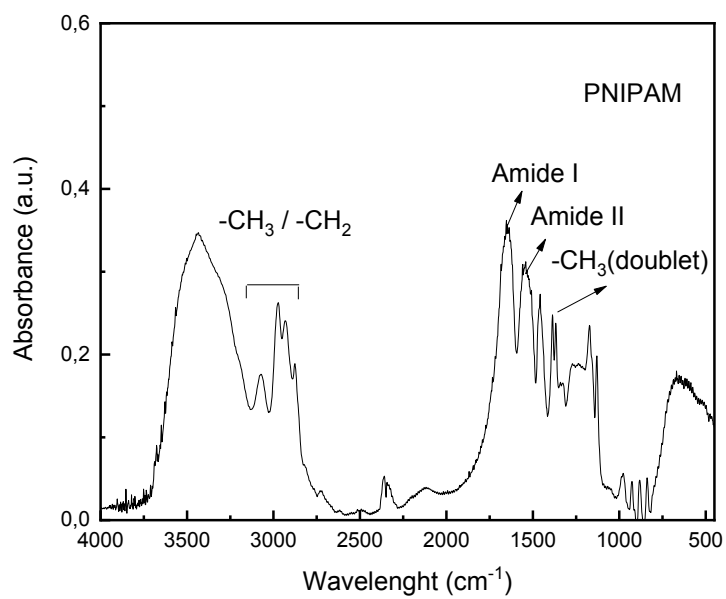

Figure S1. FTIR spectrum of PNIPAM.

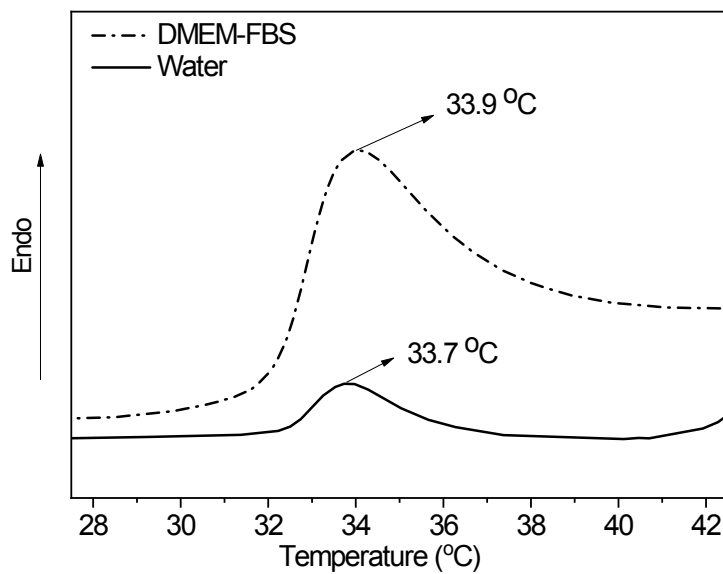

Figure S2. Thermograms of PNIPAM swelled in both mediums. (SD: 0.3, n: 4).
